# Supplementary material for: Site preference and local structural stability of Bi(iii) substitution in hydroxyapatite using first-principles simulations
Source: Royal Society of Chemistry journal article supplement (doi:10.1039/d4cp00864b), 2024-01-01
Supplement: d4cp00864b1.pdf [file d4cp00864b1.pdf]

## Supplementary Information

### Site Preference and Local Structural Stability of Bi(III) Substitution in Hydroxyapatite using First-Principles Simulations

Gerardo Martin Quindoza III<sup>1</sup>, Yasuhiro Nakagawa<sup>1</sup>, Hayato Laurence Mizuno<sup>1,2</sup>, Yasutaka Anraku<sup>1</sup>, Richard Espiritu<sup>3</sup>, and Toshiyuki Ikoma<sup>1\*</sup>

<sup>1</sup>Department of Materials Science and Engineering, School of Materials and Chemical Technology, Tokyo Institute of Technology, 2-12-1 Ookayama, Meguro-ku, Tokyo, Japan 152-8550

<sup>2</sup>Department of Biochemistry and Cellular Biology, National Center of Neurology and Psychiatry, 4-1-1 Ogawahigashicho, Kodaira-shi, Tokyo, Japan 187-0031

<sup>3</sup>Department of Mining, Metallurgical, and Materials Engineering, College of Engineering, University of the Philippines Diliman, Quezon City 1101, Philippines

\*Corresponding Author: Toshiyuki Ikoma

E-mail address: tikoma@ceram.titech.ac.jp

Phone number: +81-3-5734-2519

Fax number: +81-3-5734-3369

## S.1 Convergence test details

Before performing the geometry optimization calculations, a convergence test was conducted to ensure the accuracy of calculation using less calculation time. Convergence test was done by optimizing the cut-off value and the k-point sampling of the Brillouin zone. For faster optimizations, fluorapatite ( $\text{Ca}_{10}(\text{PO}_4)_6\text{F}_2$ ; FAp) was used as model structure. The structure of FAp is very similar to hexagonal hydroxyapatite (HAp). The only difference between the two structures would be the anion in the screw-axis, wherein FAp have  $\text{F}^-$  ions while HAp have  $\text{OH}^-$  ions. Since the  $\text{F}^-$  ion in FAp can be found in the  $z = \frac{1}{4}$  and  $\frac{3}{4}$  mirror planes, first-principles calculations of the FAp structure are simpler and faster. The initial coordinates of FAp followed the results of Rulis *et al.* <sup>1</sup>.

Initially, the conditions for GGA-PW91 functional were tested using various cut-off values ranging from 300 to 750 eV were tested using a constant k-point grid of  $2 \times 2 \times 2$ . The final energy values of these runs are presented in Fig. S1. Fig. S1 shows that the final energy reached a stable value once the cut-off value reached 600 eV; therefore, it is set as the cut-

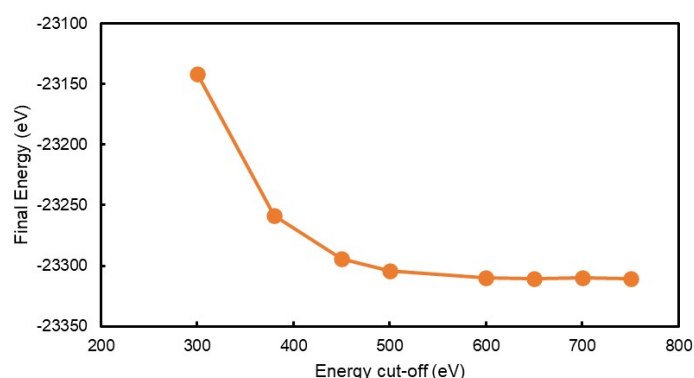

off value for the geometry optimization of HAp.

**Fig. S1.** Plot of final energy values of FAp model at varying energy cut-off and constant k-point grid of  $2 \times 2 \times 2$ .

Using 600 eV, the value of k-point is optimized using the following test values: 1×1×2, 2×2×2, 2×2×4, 3×3×3, and 4×4×4. The plot of calculated final energies is shown in Fig. S2. It is evident that the final energies did not vary a lot. The 3×3×3 setting was chosen to ensure high

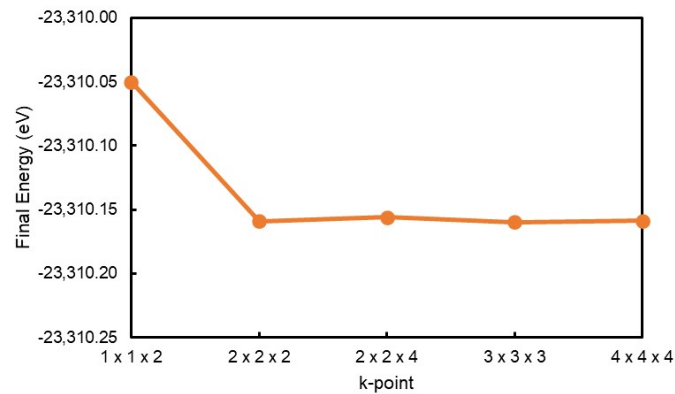

accuracy in calculations.

**Fig. S2.** Plot of final energy values of FAp model at varying k-point grids and constant energy cut-off of 600 eV.

Convergence test for the energy cut-off for the LDA/CA-PZ functional were also conducted. The results were presented in Fig. S3, and it is evident that a stable value can be obtained at 600 eV. The energy cut-off was chosen to be 600 eV and the k-point was

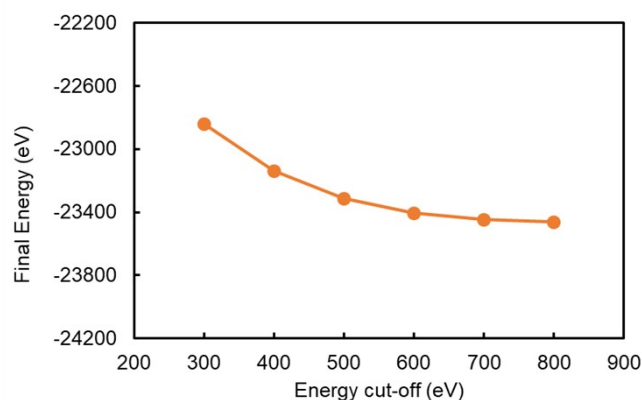

maintained at 3×3×3 for the phonon calculations.

**Fig. S3.** Plot of final energy values of FAp model at varying energy cut-off and constant k-point grid of  $2 \times 2 \times 2$  using LDA/CA-PZ functional.

## S.2 Supplementary Bi(III) substituted HAp models

It was discussed in section 2-2 of the main text that the number of model structures were decreased due to equivalency of some models. For the assumption that the position of O and OH groups above or below the mirror plane results in equivalent structures, three test models were selected. The Bi(1)HAp O model was used as reference with the arrangement of O and OH hydroxyl ions shown in Fig. S3a. The two other models have (1) O below  $z = \frac{1}{4}$  and OH above  $z = \frac{3}{4}$  (labeled as Bi(1)HAp HO-O) and (2) O above  $z = \frac{1}{4}$  and OH below  $z = \frac{3}{4}$  (labeled as Bi(1)HAp OH-O), as shown in Fig. S3b and S3c, respectively.

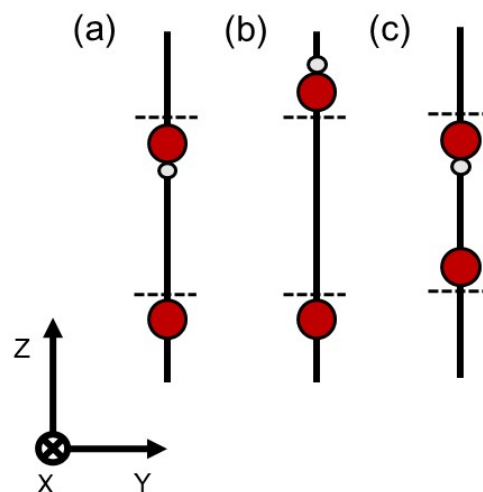

**Fig. S4** Illustration of hydroxyl channel of (a) Bi(1)HAp O (reference), (b) Bi(1)HAp with O below  $z = \frac{1}{4}$  and OH above  $z = \frac{3}{4}$ , (c) Bi(1)HAp with O above  $z = \frac{1}{4}$  and OH below  $z = \frac{3}{4}$ .

Table S1 summarized the final energy values of the three models. It is very evident that the final energy values are almost equal, and the position of O and OH groups can be practically ignored.

**Table S1.** Final energy values of Bi(1)HAp O model, Bi(1)HAp HO-O (O below  $z = \frac{1}{4}$  and OH above  $z = \frac{3}{4}$ ), and Bi(1)HAp OH-O (O above  $z = \frac{1}{4}$  and OH below  $z = \frac{3}{4}$ ).

| <b>Model Name</b>    | <b>Final Energy per atom (eV/atom)</b> |
|----------------------|----------------------------------------|
| <b>Bi(1)HAp O</b>    | -558.6125                              |
| <b>Bi(1)HAp HO-O</b> | -558.6148                              |
| <b>Bi(1)HAp OH-O</b> | -558.6123                              |

**Table S2.** Final energy values of Bi(1)HAp O, Bi(1)HAp OH, Bi(2)HAp O, and Bi(2)HAp OH models using LDA/CA-PZ functional.

| <b>Model Name</b>  | <b>Final Energy per atom (eV/atom)</b> |
|--------------------|----------------------------------------|
| <b>Bi(1)HAp O</b>  | -557.9774                              |
| <b>Bi(1)HAp OH</b> | -557.9803                              |
| <b>Bi(2)HAp O</b>  | -557.9994                              |
| <b>Bi(2)HAp OH</b> | -557.9995                              |

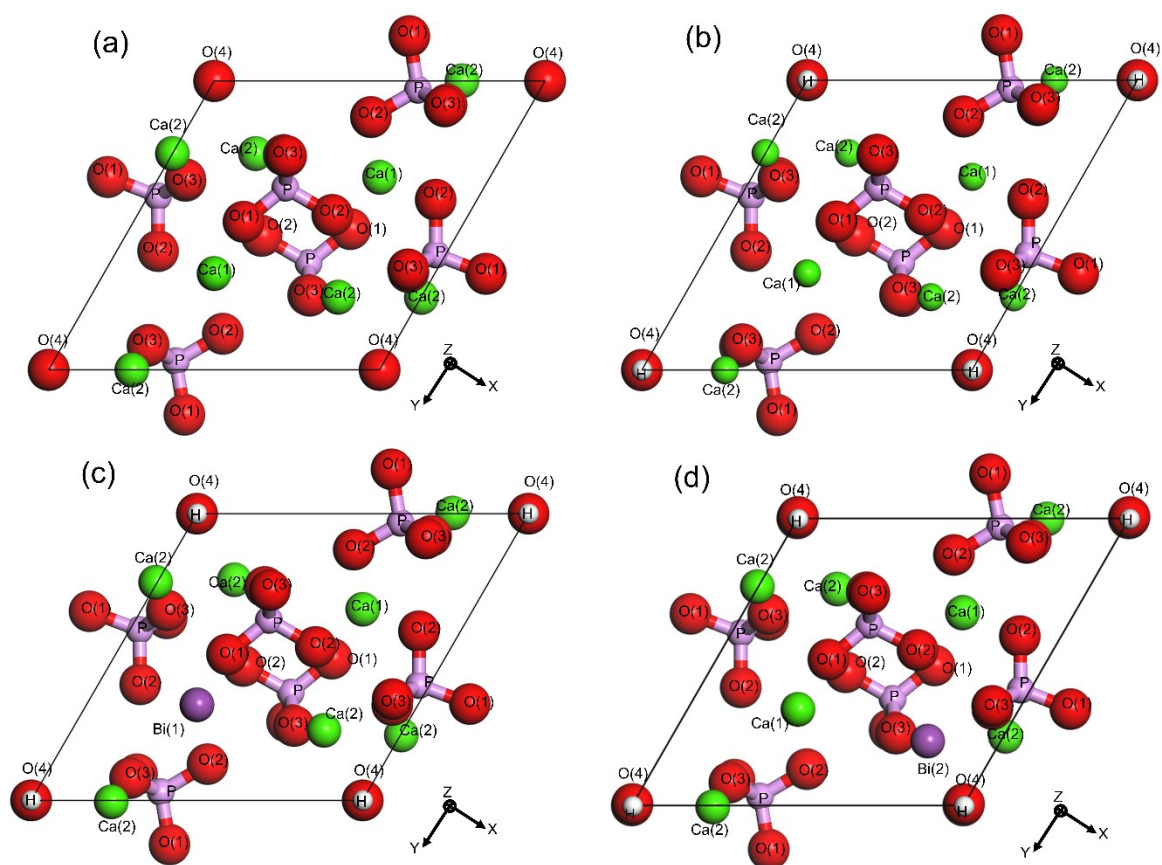

**Fig. S5.** Optimized structures of the following models (bottom view/XY plane view): (a) HAP H (OH-HO arrangement), (b) HAP O (HO-OH arrangement), (c) Bi(1)HAP OH (Bi<sup>3+</sup> near OH), and (d) Bi(2)HAP OH (Bi<sup>3+</sup> near OH).

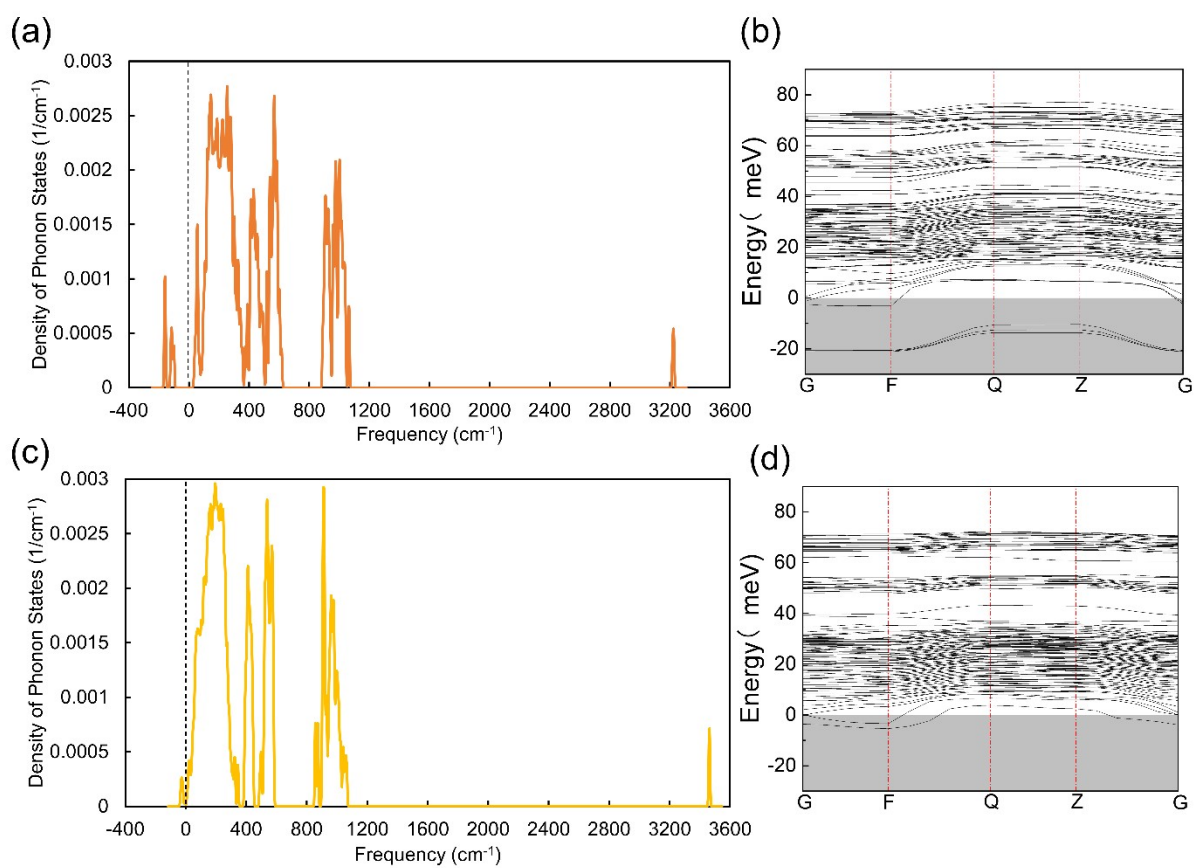

**Fig. S6.** Phonon density of states and phonon dispersions of the (a, b) Bi(1)HAp O and (c, d) Bi(2)HAp O models using the GGA-PW91 functional.



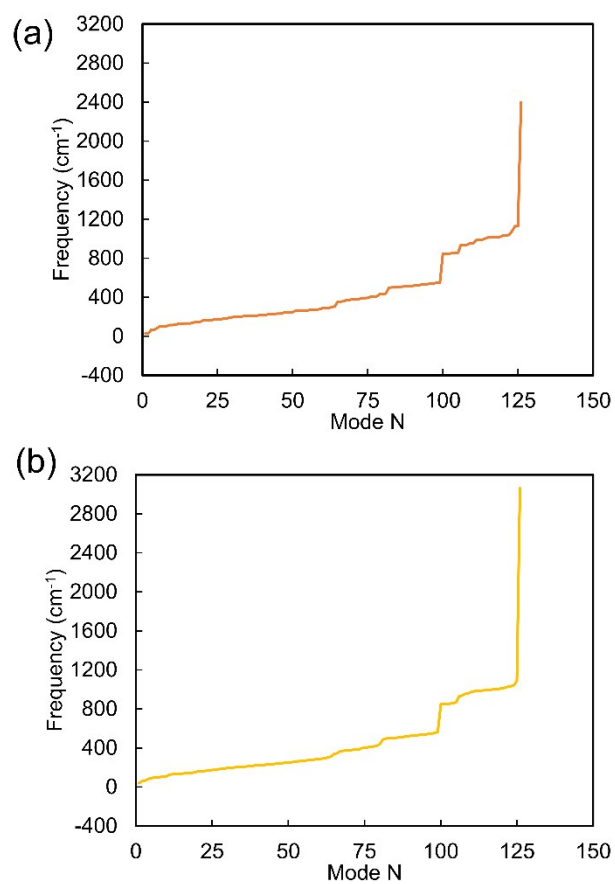

**Fig. S7.** Summary of calculated vibrational frequencies of (a) Bi(1)HAp O and (b) Bi(2)HAp O models using the LDA/CA-PZ functional.

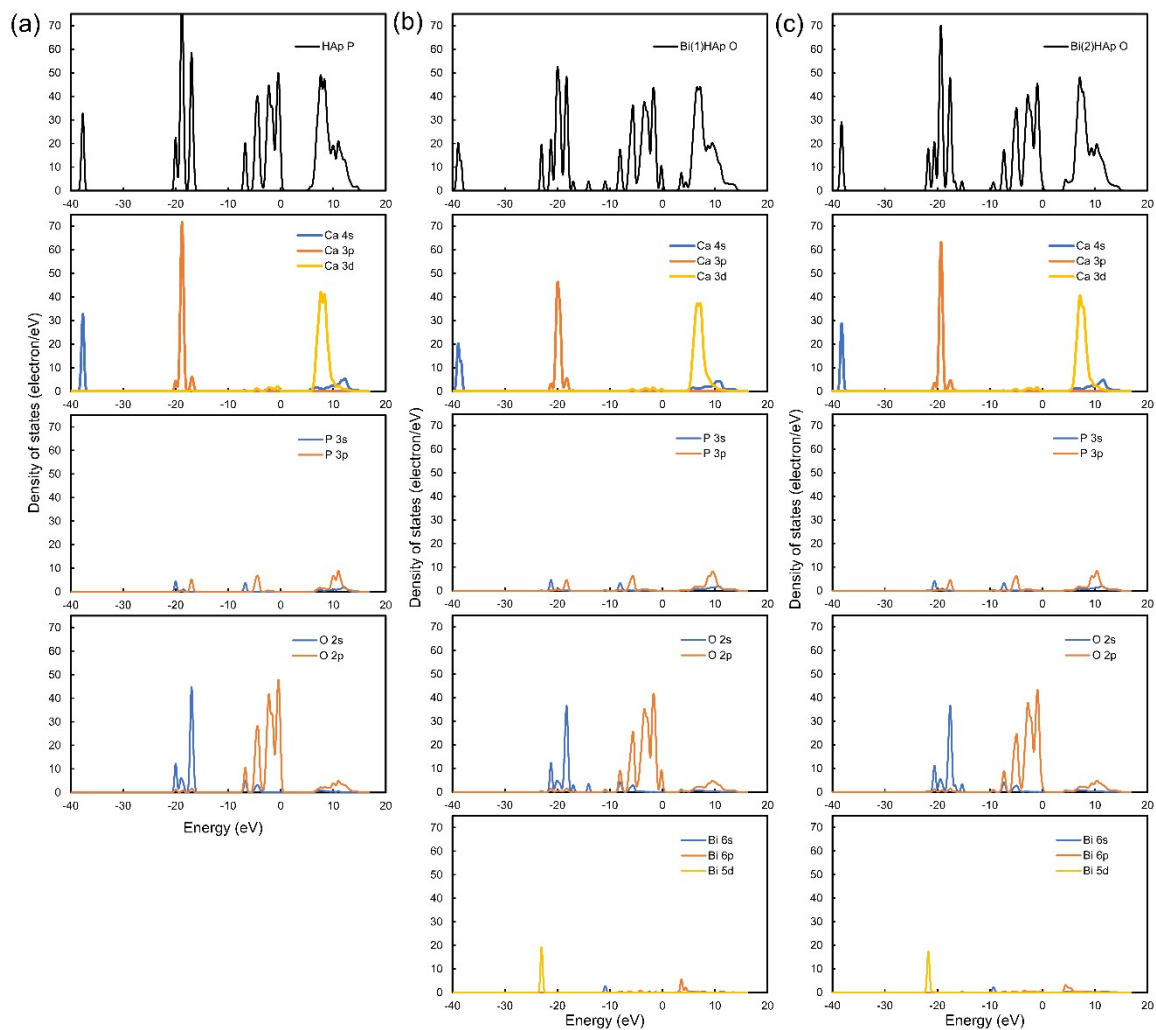

**Fig. S8.** Total density of states (DOS) and partial density of states (PDOS) plots of (a) HAp P, (b) Bi(1)HAp O, and (c) Bi(2)HAp O models.

## References

- 1 P. Rulis, L. Ouyang and W. Y. Ching, Electronic structure and bonding in calcium apatite crystals: Hydroxyapatite, fluorapatite, chlorapatite, and bromapatite, *Phys. Rev. B - Condens. Matter Mater. Phys.*, 2004, **70**, 1–8.
